# Supplementary material
Source: Springer Nature journal article supplement (https://www.springermedizin.de/resource/supplementary/12876_2010_481_MOESM7_ESM.pdf/9437106)

### A - Control

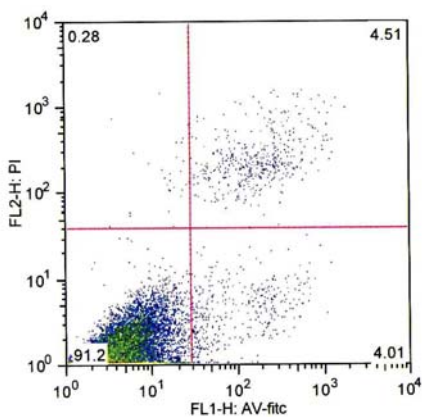

### B - NFV

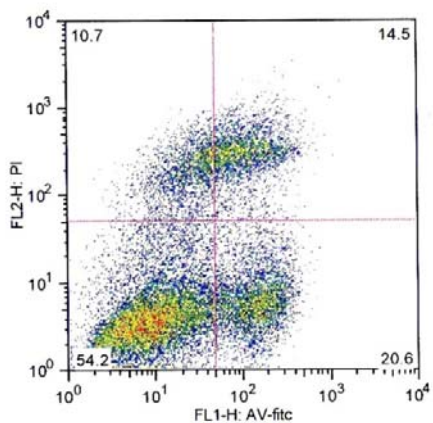

### C - IDV

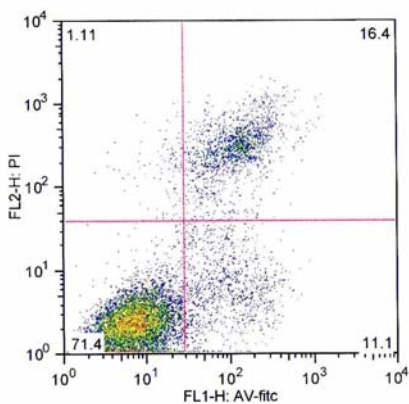

### D - AZT

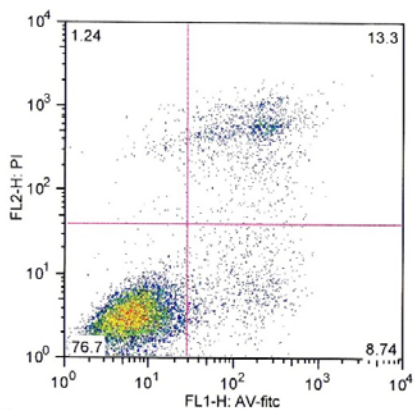

### E - DDI

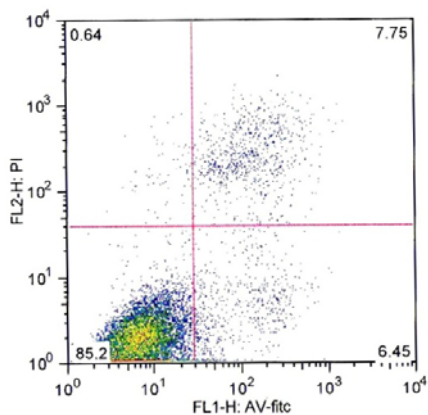

Supplement: MOESM7 [file 9437106]
